# Supplementary material for: Web-Based Interventions to Improve Mental Health in Home Caregivers of People With Dementia: Meta-Analysis
Source: PubMed Central journal article supplement (PMC6526687; doi:10.2196/13415), 2019-05-06
Supplement: jmir_v21i5e13415_app1.pdf [file jmir_v21i5e13415_app1.pdf]

| <b>Mesh Terms</b>                                                                                                                |                                                                                                                                                                                                                                                                                                                                                                                                                                                                                                                                                                                                                                                                                                                        |         |
|----------------------------------------------------------------------------------------------------------------------------------|------------------------------------------------------------------------------------------------------------------------------------------------------------------------------------------------------------------------------------------------------------------------------------------------------------------------------------------------------------------------------------------------------------------------------------------------------------------------------------------------------------------------------------------------------------------------------------------------------------------------------------------------------------------------------------------------------------------------|---------|
| (1) Internet; telemedicine; computer, handheld; cell phone; wireless technology                                                  |                                                                                                                                                                                                                                                                                                                                                                                                                                                                                                                                                                                                                                                                                                                        |         |
| (2) Caregivers; family ; spouse; Home Nursing                                                                                    |                                                                                                                                                                                                                                                                                                                                                                                                                                                                                                                                                                                                                                                                                                                        |         |
| (3) Education; health education; cognitive therapy                                                                               |                                                                                                                                                                                                                                                                                                                                                                                                                                                                                                                                                                                                                                                                                                                        |         |
| <b>Key Words and Free Words</b>                                                                                                  |                                                                                                                                                                                                                                                                                                                                                                                                                                                                                                                                                                                                                                                                                                                        |         |
| (1) Web; cyberspace ; cyber Space ; social media; distance learning; E-health ; Online ; on-line ; Skype ; webcam                |                                                                                                                                                                                                                                                                                                                                                                                                                                                                                                                                                                                                                                                                                                                        |         |
| (2) Family caregivers; home caregivers;                                                                                          |                                                                                                                                                                                                                                                                                                                                                                                                                                                                                                                                                                                                                                                                                                                        |         |
| (3) intervention*; program*; “therap*”; psycho-education*; psychoeducation*; training; support; Cognitive Therapy; psychological |                                                                                                                                                                                                                                                                                                                                                                                                                                                                                                                                                                                                                                                                                                                        |         |
| <b>1. PubMed</b>                                                                                                                 |                                                                                                                                                                                                                                                                                                                                                                                                                                                                                                                                                                                                                                                                                                                        |         |
| #1                                                                                                                               | Search(Internet [Mesh] OR telemedicine [Mesh] OR telecommunications [Mesh] OR (computers, handheld [Mesh]) OR wireless technology [Mesh] OR cell phone [Mesh])                                                                                                                                                                                                                                                                                                                                                                                                                                                                                                                                                         | 6961    |
| #2                                                                                                                               | Search(web[Title/Abstract] OR social media[Title/Abstract] OR blog*[Title/Abstract] OR social networking[Title/Abstract] OR twitter*[Title/Abstract] OR tweet*[Title/Abstract] OR online[Title/Abstract] OR instant* messag*[Title/Abstract] OR text messag*[Title/Abstract] OR text[Title/Abstract] OR texts[Title/Abstract] OR texting[Title/Abstract] OR facebook*[Title/Abstract] OR myspace[Title/Abstract] OR linkedin[Title/Abstract] OR email*[Title/Abstract] OR e-mail*[Title/Abstract] OR electronic mail[Title/Abstract] OR app[Title/Abstract] OR apps[Title/Abstract] OR message board*[Title/Abstract] OR electronic[Title/Abstract] OR e-health[Title/Abstract] OR telecommunication*[Title/Abstract]) | 25960   |
| #3                                                                                                                               | #1 OR #2                                                                                                                                                                                                                                                                                                                                                                                                                                                                                                                                                                                                                                                                                                               | 31388   |
| #4                                                                                                                               | Search(education[Mesh] OR health education[Mesh] OR cognitive therapy[Mesh])                                                                                                                                                                                                                                                                                                                                                                                                                                                                                                                                                                                                                                           | 9932    |
| #5                                                                                                                               | Search(intervention[Title/Abstract] OR program[Title/Abstract] OR therap*[Title/Abstract] OR psycho-education[Title/Abstract] OR psychoeducation [Title/Abstract] OR training[Title/Abstract] OR support[Title/Abstract] OR psychological [Title/Abstract])                                                                                                                                                                                                                                                                                                                                                                                                                                                            | 4116164 |
| #6                                                                                                                               | #4 OR #5                                                                                                                                                                                                                                                                                                                                                                                                                                                                                                                                                                                                                                                                                                               | 85770   |
| #7                                                                                                                               | Search(caregiver[Mesh] OR family[Mesh] OR Home Nursing[Mesh] OR spouse [Mesh])                                                                                                                                                                                                                                                                                                                                                                                                                                                                                                                                                                                                                                         | 3401    |
| #8                                                                                                                               | Search(friend[Title/Abstract]OR acquaintance [Title/Abstract] OR adult child[Title/Abstract] OR carer*[Title/Abstract] OR care giver*[Title/Abstract] OR caregiver*[Title/Abstract] OR caretaker*[Title/Abstract])                                                                                                                                                                                                                                                                                                                                                                                                                                                                                                     | 2174    |
| #9                                                                                                                               | #7 OR #8                                                                                                                                                                                                                                                                                                                                                                                                                                                                                                                                                                                                                                                                                                               | 4899    |
| #10                                                                                                                              | Search(Dementia[Mesh])                                                                                                                                                                                                                                                                                                                                                                                                                                                                                                                                                                                                                                                                                                 | 2594    |
| #11                                                                                                                              | Search (dementia*[Title/Abstract] or alzheimer*[Title/Abstract])                                                                                                                                                                                                                                                                                                                                                                                                                                                                                                                                                                                                                                                       | 3946    |
| #12                                                                                                                              | #10 OR #11                                                                                                                                                                                                                                                                                                                                                                                                                                                                                                                                                                                                                                                                                                             | 4240    |
| #13                                                                                                                              | #3 AND #6 AND #9 AND #12                                                                                                                                                                                                                                                                                                                                                                                                                                                                                                                                                                                                                                                                                               | 82      |

|                            |                                                                                                                                                                                                                                                                                                                                                                           |               |
|----------------------------|---------------------------------------------------------------------------------------------------------------------------------------------------------------------------------------------------------------------------------------------------------------------------------------------------------------------------------------------------------------------------|---------------|
| #14                        | Search (((((((Randomized controlled trial[Publication Type]) OR Controlled clinical trial[Publication Type]) OR Randomized[Title/Abstract]) OR Randomised[Title/Abstract]) OR Randomly[Title/Abstract]) OR Trial[Title/Abstract]) OR Groups[Title/Abstract])                                                                                                              | 1911819<br>43 |
| #15                        | #13 AND #14                                                                                                                                                                                                                                                                                                                                                               |               |
| <b>2.Cochrane Database</b> |                                                                                                                                                                                                                                                                                                                                                                           |               |
| #1                         | MeSH descriptor: [Internet] explode all trees                                                                                                                                                                                                                                                                                                                             | 8466          |
| #2                         | MeSH descriptor: [Telephone] explode all trees                                                                                                                                                                                                                                                                                                                            | 15405         |
| #3                         | MeSH descriptor: [Computer, handheld] explode all trees                                                                                                                                                                                                                                                                                                                   | 334           |
| #4                         | MeSH descriptor: [Wireless technology] explode all trees                                                                                                                                                                                                                                                                                                                  | 229           |
| #5                         | MeSH descriptor: [Cellphone] explode all trees                                                                                                                                                                                                                                                                                                                            | 87            |
| #6                         | (internet OR web OR cyberspace OR World Wide Web OR user-computer interface OR mobile OR cellular phone OR social media OR smart-phone OR interactive OR Facebook OR twitter OR Tablet OR iPad OR distance learning OR e-health OR Online OR on-line OR Skype OR webcam OR Videophone OR Telemedicine OR Wireless OR Wi-Fi):ti,ab,kw (Word variations have been searched) | 92331         |
| #7                         | #1 OR #2 OR #3 OR #4 OR #5 OR #6                                                                                                                                                                                                                                                                                                                                          | 105173        |
| #8                         | MeSH descriptor: [Webcasts] this term only                                                                                                                                                                                                                                                                                                                                | 65            |
| #9                         | (webcast* or podcast* or streaming video* or RSS or really simple syndication or YouTube): ti,ab,kw(Word variations have been searched)                                                                                                                                                                                                                                   | 539           |
| #10                        | #7 or #8 or #9                                                                                                                                                                                                                                                                                                                                                            | 105597        |
| #11                        | MeSH descriptor: [Caregivers] this term only                                                                                                                                                                                                                                                                                                                              | 6992          |
| #12                        | MeSH descriptor: [Family] this term only                                                                                                                                                                                                                                                                                                                                  | 29369         |
| #13                        | MeSH descriptor: [Adult Children] this term only                                                                                                                                                                                                                                                                                                                          | 33819         |
| #14                        | MeSH descriptor: [Spouses] this term only                                                                                                                                                                                                                                                                                                                                 | 802           |
| #15                        | MeSH descriptor: [Home Nursing] explode all trees                                                                                                                                                                                                                                                                                                                         | 5735          |
| #16                        | (carer* or caretaker* or care-giver* or caregiver*): ti, ab, kw(Word variations have been searched)                                                                                                                                                                                                                                                                       | 9757          |
| #17                        | (adult child* or spous*): ti, ab, kw (Word variations have been searched)                                                                                                                                                                                                                                                                                                 | 34945         |
| #18                        | #11 or #12 or #13 or #14 or #15 or #16 or #17                                                                                                                                                                                                                                                                                                                             | 75199         |
| #19                        | MeSH descriptor: [Dementia] explode all trees                                                                                                                                                                                                                                                                                                                             | 18033         |
| #20                        | (dementia* or alzheimer*): ti, ab, kw (Word variations have been searched)                                                                                                                                                                                                                                                                                                | 14267         |
| #21                        | #19 or #20                                                                                                                                                                                                                                                                                                                                                                | 20337         |
| #22                        | MeSH descriptor: [Education] explode all trees                                                                                                                                                                                                                                                                                                                            | 58403         |
| #23                        | MeSH descriptor: [Health education] explode all trees                                                                                                                                                                                                                                                                                                                     | 33162         |
| #24                        | MeSH descriptor: [Cognitive therapy] explode all trees                                                                                                                                                                                                                                                                                                                    | 28433         |
| #25                        | (intervention OR program OR training OR therap* OR psycho-education OR psychoeducation OR acquaintance): ti,ab,kw(Word variations have been searched)                                                                                                                                                                                                                     | 266981        |

|                  |                                                                                                                                                                                                                                                                                                                                                                                                                                                                                                                                                                                                                                                                      |        |
|------------------|----------------------------------------------------------------------------------------------------------------------------------------------------------------------------------------------------------------------------------------------------------------------------------------------------------------------------------------------------------------------------------------------------------------------------------------------------------------------------------------------------------------------------------------------------------------------------------------------------------------------------------------------------------------------|--------|
| #26              | #22 or #23 or #24 or #25                                                                                                                                                                                                                                                                                                                                                                                                                                                                                                                                                                                                                                             | 295120 |
| #27              | #7 and #10and #18and #21 and #26 content type: Trials                                                                                                                                                                                                                                                                                                                                                                                                                                                                                                                                                                                                                | 549    |
| <b>3. CINAHL</b> |                                                                                                                                                                                                                                                                                                                                                                                                                                                                                                                                                                                                                                                                      |        |
| S1               | (MH "Internet")                                                                                                                                                                                                                                                                                                                                                                                                                                                                                                                                                                                                                                                      | 24454  |
| S2               | (MH "computers handheld")                                                                                                                                                                                                                                                                                                                                                                                                                                                                                                                                                                                                                                            | 1305   |
| S3               | (MH "World Wide Web")                                                                                                                                                                                                                                                                                                                                                                                                                                                                                                                                                                                                                                                | 31989  |
| S4               | (MH "Social Media")                                                                                                                                                                                                                                                                                                                                                                                                                                                                                                                                                                                                                                                  | 5354   |
| S5               | (MH "World Wide Web Applications")                                                                                                                                                                                                                                                                                                                                                                                                                                                                                                                                                                                                                                   | 2751   |
| S6               | (MH "Electronic Mail")                                                                                                                                                                                                                                                                                                                                                                                                                                                                                                                                                                                                                                               | 16613  |
| S7               | TI ((internet or web or social media or blog* or social networking or twitter* or tweet* or online or instant* messag* or text messag* or text or texts or texting or facebook* or myspace or linkedin or email* or email* or electronic mail or app or apps or message board* or electronic or ehealth or telecommunication*) ) OR AB ( (internet or web or social media or blog* or social networking or twitter* or tweet* or online or instant* messag* or text messag* or text or texts or texting or facebook* or myspace or linkedin or email* or email* or electronic mail or app or apps or message board* or electronic or ehealth or telecommunication*)) | 103533 |
| S8               | TI ( (webcast* or podcast* or streaming video* or RSS or really simple syndication or youtube) ) or AB ( (webcast* or podcast* or streaming video* or RSS or really simple syndication or youtube) )                                                                                                                                                                                                                                                                                                                                                                                                                                                                 | 1153   |
| S9               | (MH "Webcasts+")                                                                                                                                                                                                                                                                                                                                                                                                                                                                                                                                                                                                                                                     | 382    |
| S10              | (MH "Social Networking")                                                                                                                                                                                                                                                                                                                                                                                                                                                                                                                                                                                                                                             | 1220   |
| S11              | S1 or S2 or S3 or S4 or S5 or S6 or S7 or S8 or S9 or S10                                                                                                                                                                                                                                                                                                                                                                                                                                                                                                                                                                                                            | 151606 |
| S12              | (MH "Caregivers")                                                                                                                                                                                                                                                                                                                                                                                                                                                                                                                                                                                                                                                    | 15097  |
| S13              | TI ( (carer* or caretaker* or caregiver* or caregiver*) ) or AB ( (carer* or caretaker* or caregiver* or caregiver*) )                                                                                                                                                                                                                                                                                                                                                                                                                                                                                                                                               | 25888  |
| S14              | (MH "Family") or (MH "Adult Children")                                                                                                                                                                                                                                                                                                                                                                                                                                                                                                                                                                                                                               | 20267  |
| S15              | (MH "Spouses")                                                                                                                                                                                                                                                                                                                                                                                                                                                                                                                                                                                                                                                       | 4991   |
| S16              | TI ( (adult child* or spous*) ) or AB ( (adult child* or spous*) )                                                                                                                                                                                                                                                                                                                                                                                                                                                                                                                                                                                                   | 16935  |
| S17              | S12 or S13 or S14 or S15 or S16                                                                                                                                                                                                                                                                                                                                                                                                                                                                                                                                                                                                                                      | 64720  |
| S18              | (MH " Dementia ")                                                                                                                                                                                                                                                                                                                                                                                                                                                                                                                                                                                                                                                    | 13906  |
| S19              | TI(dementia* or alzheimer*) or AB(dementia* or alzheimer*)                                                                                                                                                                                                                                                                                                                                                                                                                                                                                                                                                                                                           | 24907  |
| S20              | S18 or S19                                                                                                                                                                                                                                                                                                                                                                                                                                                                                                                                                                                                                                                           | 28530  |
| S21              | (MH "Education")                                                                                                                                                                                                                                                                                                                                                                                                                                                                                                                                                                                                                                                     | 5565   |
| S22              | (MH "Health education")                                                                                                                                                                                                                                                                                                                                                                                                                                                                                                                                                                                                                                              | 11259  |
| S23              | (MH "Cognitive therapy")                                                                                                                                                                                                                                                                                                                                                                                                                                                                                                                                                                                                                                             | 9835   |
| S24              | TI (intervention or program or therap* or psycho-education or psychoeducation or training or acquaintance ) OR AB ( (intervention or program or therap* or psycho-education or psychoeducation or training or acquaintance) )                                                                                                                                                                                                                                                                                                                                                                                                                                        | 524721 |
| S25              | S21 or S22 or S23 or S24                                                                                                                                                                                                                                                                                                                                                                                                                                                                                                                                                                                                                                             | 538830 |
| S26              | S11 and S17 and S20 and S25                                                                                                                                                                                                                                                                                                                                                                                                                                                                                                                                                                                                                                          | 156    |

| <b>4.PsycINFO</b> |                                                                                                                                                                                                                                                                                                                                                                                                                                                                                                                                                                                                                                                                      |        |
|-------------------|----------------------------------------------------------------------------------------------------------------------------------------------------------------------------------------------------------------------------------------------------------------------------------------------------------------------------------------------------------------------------------------------------------------------------------------------------------------------------------------------------------------------------------------------------------------------------------------------------------------------------------------------------------------------|--------|
| S1                | (MH "Internet")                                                                                                                                                                                                                                                                                                                                                                                                                                                                                                                                                                                                                                                      | 223    |
| S2                | (MH "computers handheld")                                                                                                                                                                                                                                                                                                                                                                                                                                                                                                                                                                                                                                            | 2      |
| S3                | (MH "World Wide Web")                                                                                                                                                                                                                                                                                                                                                                                                                                                                                                                                                                                                                                                | 169    |
| S4                | (MH "Social Media")                                                                                                                                                                                                                                                                                                                                                                                                                                                                                                                                                                                                                                                  | 698    |
| S5                | (MH "World Wide Web Applications")                                                                                                                                                                                                                                                                                                                                                                                                                                                                                                                                                                                                                                   | 201    |
| S6                | (MH "Electronic Mail")                                                                                                                                                                                                                                                                                                                                                                                                                                                                                                                                                                                                                                               | 2155   |
| S7                | TI ((internet or web or social media or blog* or social networking or twitter* or tweet* or online or instant* messag* or text messag* or text or texts or texting or facebook* or myspace or linkedin or email* or email* or electronic mail or app or apps or message board* or electronic or ehealth or telecommunication*) ) OR AB ( (internet or web or social media or blog* or social networking or twitter* or tweet* or online or instant* messag* or text messag* or text or texts or texting or facebook* or myspace or linkedin or email* or email* or electronic mail or app or apps or message board* or electronic or ehealth or telecommunication*)) | 111731 |
| S8                | TI ( (webcast* or podcast* or streaming video* or RSS or really simple syndication or youtube) ) or AB ( (webcast* or podcast* or streaming video* or RSS or really simple syndication or youtube) )                                                                                                                                                                                                                                                                                                                                                                                                                                                                 | 912    |
| S9                | (MH "Webcasts+")                                                                                                                                                                                                                                                                                                                                                                                                                                                                                                                                                                                                                                                     | 0      |
| S10               | (MH "Social Networking")                                                                                                                                                                                                                                                                                                                                                                                                                                                                                                                                                                                                                                             | 675    |
| S11               | S1 or S2 or S3 or S4 or S5 or S6 or S7 or S8 or S9 or S10                                                                                                                                                                                                                                                                                                                                                                                                                                                                                                                                                                                                            | 116092 |
| S12               | (MH "Caregivers")                                                                                                                                                                                                                                                                                                                                                                                                                                                                                                                                                                                                                                                    | 3      |
| S13               | TI ( (carer* or caretaker* or caregiver* or caregiver*) ) or AB ( (carer* or caretaker* or caregiver* or caregiver*) )                                                                                                                                                                                                                                                                                                                                                                                                                                                                                                                                               | 24815  |
| S14               | (MH "Family") or (MH "Adult Children")                                                                                                                                                                                                                                                                                                                                                                                                                                                                                                                                                                                                                               | 12     |
| S15               | (MH "Spouses")                                                                                                                                                                                                                                                                                                                                                                                                                                                                                                                                                                                                                                                       | 12     |
| S16               | TI ( (adult child* or spous*) ) or AB ( (adult child* or spous*) )                                                                                                                                                                                                                                                                                                                                                                                                                                                                                                                                                                                                   | 29252  |
| S17               | S12 or S13 or S14 or S15 or S16                                                                                                                                                                                                                                                                                                                                                                                                                                                                                                                                                                                                                                      | 29264  |
| S18               | (MH " Dementia ")                                                                                                                                                                                                                                                                                                                                                                                                                                                                                                                                                                                                                                                    | 1      |
| S19               | TI(dementia* or alzheimer*) or AB(dementia* or alzheimer*)                                                                                                                                                                                                                                                                                                                                                                                                                                                                                                                                                                                                           | 37075  |
| S20               | S18 or S19                                                                                                                                                                                                                                                                                                                                                                                                                                                                                                                                                                                                                                                           | 37075  |
| S21               | (MH "Education")                                                                                                                                                                                                                                                                                                                                                                                                                                                                                                                                                                                                                                                     | 5      |
| S22               | (MH "Health education")                                                                                                                                                                                                                                                                                                                                                                                                                                                                                                                                                                                                                                              | 1      |
| S23               | (MH "Cognitive therapy")                                                                                                                                                                                                                                                                                                                                                                                                                                                                                                                                                                                                                                             | 596    |
| S24               | TI (intervention or program or therap* or psycho-education or psychoeducation or training or acquaintance ) OR AB ( (intervention or program or therap* or psycho-education or psychoeducation or training or acquaintance) )                                                                                                                                                                                                                                                                                                                                                                                                                                        | 448340 |
| S25               | S21 or S22 or S23 or S24                                                                                                                                                                                                                                                                                                                                                                                                                                                                                                                                                                                                                                             | 439096 |
| S26               | S11 and S17 and S20 and S25 Limiters-Language:English                                                                                                                                                                                                                                                                                                                                                                                                                                                                                                                                                                                                                | 10     |
| <b>5. EMBASE</b>  |                                                                                                                                                                                                                                                                                                                                                                                                                                                                                                                                                                                                                                                                      |        |
| #1                | 'internet'/exp OR internet                                                                                                                                                                                                                                                                                                                                                                                                                                                                                                                                                                                                                                           | 124809 |

|     |                                                                                                                                                                                   |         |
|-----|-----------------------------------------------------------------------------------------------------------------------------------------------------------------------------------|---------|
| #2  | 'internet': ab,ti                                                                                                                                                                 | 58667   |
| #3  | 'web':ab,ti                                                                                                                                                                       | 110304  |
| #4  | 'social media'                                                                                                                                                                    | 14865   |
| #5  | 'social media':ab,ti                                                                                                                                                              | 9734    |
| #6  | 'app':ab,ti OR 'apps':ab,ti                                                                                                                                                       | 32164   |
| #7  | 'twitter':ab,ti                                                                                                                                                                   | 2945    |
| #8  | 'tweet*':ab,ti                                                                                                                                                                    | 1917    |
| #9  | 'online':ab,ti                                                                                                                                                                    | 122704  |
| #10 | 'message board*':ab,ti                                                                                                                                                            | 221     |
| #11 | 'instant* messag*':ab,ti                                                                                                                                                          | 323     |
| #12 | text AND messaging                                                                                                                                                                | 4341    |
| #13 | 'text messag*':ab,ti                                                                                                                                                              | 3941    |
| #14 | 'text*':ab,ti                                                                                                                                                                     | 130903  |
| #15 | 'facebook':ab,ti                                                                                                                                                                  | 3988    |
| #16 | 'myspace':ab,ti                                                                                                                                                                   | 117     |
| #17 | 'linkedin':ab,ti                                                                                                                                                                  | 213     |
| #18 | 'e mail'                                                                                                                                                                          | 45065   |
| #19 | 'email*':ab,ti                                                                                                                                                                    | 15397   |
| #20 | webcast                                                                                                                                                                           | 538     |
| #21 | 'electronic':ab,ti                                                                                                                                                                | 219859  |
| #22 | 'social networking':ab,ti                                                                                                                                                         | 2681    |
| #23 | 'webcast*':ab,ti OR 'podcast*':ab,ti OR 'streaming video*':ab,ti OR 'rss':ab,ti OR 'really simple syndication':ab,ti OR 'youtube':ab,ti                                           | 5224    |
| #24 | #1 OR #2 OR #3 OR #4 OR #5 OR #6 OR #7 OR #8 OR #9 OR #10 OR #11 OR #12 OR #13 OR #14 OR #15 OR #16 OR #17 OR #18 OR #19 OR #20 OR #21 OR #22 OR #23                              | 698510  |
| #25 | caregiver                                                                                                                                                                         | 80643   |
| #26 | 'carer*':ab,ti OR 'care giver*':ab,ti OR 'caregiver*':ab,ti OR 'caretaker*':ab,ti                                                                                                 | 97006   |
| #27 | family                                                                                                                                                                            | 1251271 |
| #28 | adult AND child                                                                                                                                                                   | 740051  |
| #29 | spouse                                                                                                                                                                            | 20751   |
| #30 | 'adult child*':ab,ti OR 'spous*':ab,ti                                                                                                                                            | 24456   |
| #31 | #25 OR #27 OR #28 OR #29 OR #30                                                                                                                                                   | 198898  |
| #32 | dementia                                                                                                                                                                          | 195938  |
| #33 | 'dementia*':ab,ti OR 'alzheimer*':ab,ti                                                                                                                                           | 261232  |
| #34 | #32 OR #33                                                                                                                                                                        | 300656  |
| #35 | education                                                                                                                                                                         | 1514781 |
| #36 | health AND education                                                                                                                                                              | 745517  |
| #37 | cognitive AND therapy                                                                                                                                                             | 172037  |
| #38 | 'intervention':ab,ti OR 'program':ab,ti OR 'therap*':ab,ti OR 'psycho-education':ab,ti OR 'psychoeducation':ab,ti OR 'training':ab,ti OR 'support':ab,ti OR 'psychological':ab,ti | 5827805 |

|     |                                               |         |
|-----|-----------------------------------------------|---------|
| #39 | #32 OR #33 OR #34 OR #35                      | 1034082 |
| #40 | #24 AND #31 AND #34 AND #39                   | 2429    |
| #41 | #24 AND #31 AND #34 AND #39 AND [english]/lim | 2369    |
