# Supplementary material for: Web-Based Interventions to Improve Mental Health in Home Caregivers of People With Dementia: Meta-Analysis
Source: J Med Internet Res. 2019 May 6;21(5):e13415. doi: 10.2196/13415 (PMC6526687; doi:10.2196/13415)
Supplement: Multimedia Appendix 2 [file jmir_v21i5e13415_app2.pdf]

| Study/Year                           | Participation<br>(caregivers)                                                                            | Intervention                                                                                                                                                                                                                                                                                 | Comparison                                                                 | Outcome measures                                                                                                                                                                                                                                                                                                            | Results                                                                                                                                                                                        |
|--------------------------------------|----------------------------------------------------------------------------------------------------------|----------------------------------------------------------------------------------------------------------------------------------------------------------------------------------------------------------------------------------------------------------------------------------------------|----------------------------------------------------------------------------|-----------------------------------------------------------------------------------------------------------------------------------------------------------------------------------------------------------------------------------------------------------------------------------------------------------------------------|------------------------------------------------------------------------------------------------------------------------------------------------------------------------------------------------|
| Beauchamp et al<br>[37]/2005         | 150 caregivers of people with substantial memory problems in intervention group and 149 in control group | <p>Caregiver's Friend: Dealing with Dementia</p> <p><b>key components:</b>①provides text material and videos for the caregivers' knowledge, cognitive, emotion, behavioral skill.</p> <p><b>Total duration:</b> 6 months access to intervention</p>                                          | Usual care and waitlist control.                                           | <p>There was not clear state primary outcomes, however there were four outcomes of interest:</p> <p>(i)depression (CES-D);</p> <p>(ii)state anxiety (the State-Trait Anxiety inventory);</p> <p>(iii)caregivers gain (Positive Aspects of Caregiving survey);</p> <p>(iv)caregiver strain (Caregiver Strain Instrument)</p> | <p><b>Positive outcomes:</b> depression, anxiety, stress, caregiver strain and caregiver gain, self-efficacy, and intention to seek help.</p> <p><b>Negative outcomes:</b> ways of coping.</p> |
| Kajiyama et al <sup>[40]</sup> /2013 | 57 caregivers of people with dementia in intervention group and 46 in control group                      | <p>iCare stress Management e-Training program</p> <p><b>key components:</b> Eight topics about six modules and each module over a 7- to 10-day interval, embedded the video clips illustrating how to do skills presented.</p> <p><b>Total duration:</b> 3 months access to intervention</p> | EOC: a website containing information about dementia and written materials | <p>There was not clear state primary outcomes, however there were four outcomes of interest:</p> <p>(i)perceived stress(PSS);</p> <p>(ii)level of bother due to disruptive behaviors(RMBPC);</p> <p>(iii)depression (CES-D);</p> <p>(iv)Quality of life(PQoL)</p>                                                           | <p><b>Positive outcomes:</b> perceived stress and level of bother due to disruptive in the ICC but not the EOC.</p> <p><b>Negative outcomes:</b> depressive symptoms and quality of life</p>   |

|                                     |                                                                                                                      |                                                                                                                                                                                                                                                                                                                                                                                         |                                                                                                                                        |                                                                                                                                                                                                                                      |                                                                                                                                                                                                 |
|-------------------------------------|----------------------------------------------------------------------------------------------------------------------|-----------------------------------------------------------------------------------------------------------------------------------------------------------------------------------------------------------------------------------------------------------------------------------------------------------------------------------------------------------------------------------------|----------------------------------------------------------------------------------------------------------------------------------------|--------------------------------------------------------------------------------------------------------------------------------------------------------------------------------------------------------------------------------------|-------------------------------------------------------------------------------------------------------------------------------------------------------------------------------------------------|
| Hattink et al <sup>[42]</sup> /2015 | 72 informal caregivers of person with dementia living in the community and 24 volunteers in community dementia cate. | <p>STAR:(Skills Training and Reskilling)</p> <p><b>key components:</b>①provides online course with 8 modules on different topics in caregiving, provides text, video, interactive exercises(quizzes),knowledge tests, references to other website, literature videos.② tailored peer support (Facebook communication )</p> <p><b>Total duration:</b> 6 month access to intervention</p> | Randomly allocated to a 4-mouth waitlist for access to STAR                                                                            | <p><b>Primary:</b>(i)knowledge on dementia(ADKS);(ii)attitudes regarding dementia(2 questions)</p> <p><b>Secondary:</b>(i)empathy(IRI); (ii)quality of life(2 questions); (iii)burden(1 question); (iv)sense of competence(SSCQ)</p> | <p><b>Positive outcomes:</b> empathy, knowledge, perspective and sense of competence. significant decrease in distress.</p> <p><b>Negative outcomes:</b> burden, attitude, quality of life.</p> |
| Blom et al <sup>[38]</sup> /2015    | 245 family caregivers of people with dementia.                                                                       | <p>Mastery over Dementia (MoD)</p> <p><b>key components:</b> provides 8 lessons and booster session with the guidance of a coach monitoring progress and evaluating the homework. Each lesson consist of information (text material and videos).</p> <p><b>Total duration:</b>5-6 month access to intervention</p>                                                                      | Minimal intervention consisting of e-bulletins with practical information on caring for person with dementia. No contact with a coach. | <p><b>Primary:</b> depression (CES-D)</p> <p><b>Secondary:</b> (i)symptoms of anxiety (HADS); (ii)perceptions of distress (Self-Perceived Pressure from Informal Care scale);</p>                                                    | <p><b>Positive outcomes:</b> anxiety and depression</p> <p><b>Negative outcome:</b> distress</p>                                                                                                |

|                                                |                                                                                     |                                                                                                                                                                                                                                                                                                                                                                                                                 |             |                                                                                                                                                                                                                                                                                                                         |                                                                                                                                                                                                                                          |
|------------------------------------------------|-------------------------------------------------------------------------------------|-----------------------------------------------------------------------------------------------------------------------------------------------------------------------------------------------------------------------------------------------------------------------------------------------------------------------------------------------------------------------------------------------------------------|-------------|-------------------------------------------------------------------------------------------------------------------------------------------------------------------------------------------------------------------------------------------------------------------------------------------------------------------------|------------------------------------------------------------------------------------------------------------------------------------------------------------------------------------------------------------------------------------------|
| Cristancho-Lacroix et al <sup>[39]</sup> /2015 | 25 caregivers of people with dementia in intervention group and 24 in control group | <p>Diapason</p> <p><b>key components:</b>①provides 12 weekly online sessions, each session include theoretical and practical information, videos of health professionals and practice guide for applying the session's content.②provides relaxation training, life story, the private and anonymous forum for caregivers to share with peers.</p> <p><b>Total duration:</b> 3 months access to intervention</p> | Usual care. | <p><b>Primary:</b> stress of caregivers (PSS)</p> <p><b>Secondary:</b></p> <p>(i)self-efficacy (RSCS);</p> <p>(ii)perception and reaction to cognitive or behavioral symptoms (RMBPC); (iii)subjective burden(Zarit Burden Interview);</p> <p>(iv)depression symptoms(BDI-II);</p> <p>(v)self-perceived health(NHP)</p> | <p><b>Positive outcomes:</b></p> <p>Knowledge and stress</p> <p><b>Negative outcomes:</b></p> <p>burden, depression, reaction to problem behaviors, self-efficacy, self-perceived health, energy, coping and quality of relationship</p> |
|------------------------------------------------|-------------------------------------------------------------------------------------|-----------------------------------------------------------------------------------------------------------------------------------------------------------------------------------------------------------------------------------------------------------------------------------------------------------------------------------------------------------------------------------------------------------------|-------------|-------------------------------------------------------------------------------------------------------------------------------------------------------------------------------------------------------------------------------------------------------------------------------------------------------------------------|------------------------------------------------------------------------------------------------------------------------------------------------------------------------------------------------------------------------------------------|

|                              |                                                   |                                                                                                                                                                                                                                                                                                                                                                                                                                                                                      |            |                                                                                                                                                                                                                                                         |                                                                                                                    |
|------------------------------|---------------------------------------------------|--------------------------------------------------------------------------------------------------------------------------------------------------------------------------------------------------------------------------------------------------------------------------------------------------------------------------------------------------------------------------------------------------------------------------------------------------------------------------------------|------------|---------------------------------------------------------------------------------------------------------------------------------------------------------------------------------------------------------------------------------------------------------|--------------------------------------------------------------------------------------------------------------------|
| Torkamani et al<br>[41]/2014 | 60 caregivers of people with dementia from 3 site | ALADDIN<br><br><b>key components:</b> ①ALADDIN TV: information and education material, relaxation.②SOCIAL NETWORKING: forum for caregivers to communicate with each other.③MY TASKS: caregivers complete questionnaires about their own and relatives health that can generate clinical alerts, monitored by clinicians who can respond quickly;④CONTACT US: caregivers can alert clinical site and request contact<br><br><b>Total duration:</b> 6 months    access to intervention | Usual care | There was not clear state primary outcomes , however there were four outcomes of interest:<br>(i)burden(Zarit Burden Interview);<br>(ii)depression system(BDI and Zung);<br>(iii)distress (NPI);<br>(iv)Quality of life(EQ5D and Quality of Life Scale) | <b>Positive outcomes:</b><br>distress and quality of life<br><br><b>Negative outcome:</b><br>burden and depression |
|------------------------------|---------------------------------------------------|--------------------------------------------------------------------------------------------------------------------------------------------------------------------------------------------------------------------------------------------------------------------------------------------------------------------------------------------------------------------------------------------------------------------------------------------------------------------------------------|------------|---------------------------------------------------------------------------------------------------------------------------------------------------------------------------------------------------------------------------------------------------------|--------------------------------------------------------------------------------------------------------------------|

**Abbreviations:** CES-D, Center for Epidemiologic Studies–Depression; PSS, Perceived Stress Scale; RMBPC, Revised Memory and Behavior Problems Checklist; PQoL, Perceived quality of life; ADKS, Alzheimer’s Disease Knowledge Scale; IRI, Interpersonal Reactivity Index; SSCQ, Short Sense of Competence Questionnaire; HADS, Hospital Anxiety and Depression Scale; RSCS, Revised Scale for Caregiving; BDI-II, Beck Depression Inventory; NHP, Nottingham Health Profile; NPI, Neuropsychiatric Inventory; Zung, Zung Depression Self Rating Scale; EQ5D, EuroQoL.
